# Supplementary material for: Survey of cryptic unstable transcripts in yeast
Source: PubMed Central journal article supplement (PMC4845318; doi:10.1186/s12864-016-2622-5), 2016-04-26

**A.** CUT 3' Nucleosome Metagene Plot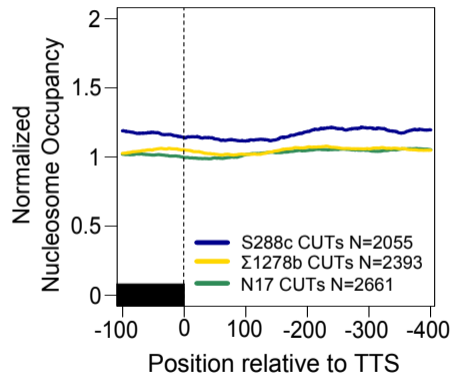**B.** S288c 3' Nucleosome Metagene Plot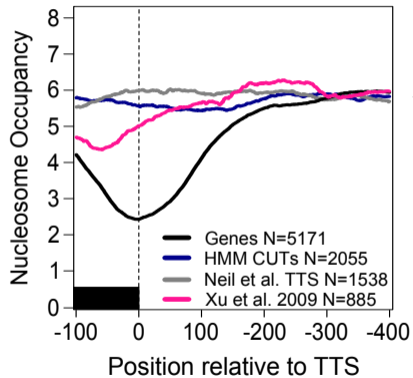

Split  
Xu et al. 2009 CUTs  
by HMM Overlap

S288c 3' Nucleosome Metagene Plot

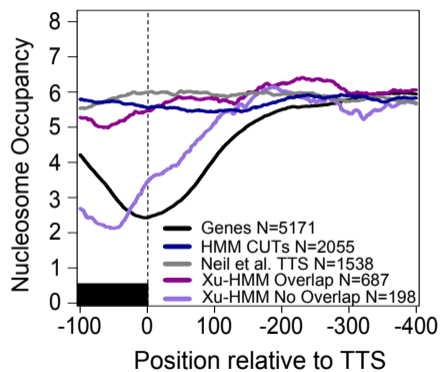

Supplement: 12864_2016_2622_MOESM3_ESM.pdf [file 12864_2016_2622_MOESM3_ESM.pdf]
