# Supplementary material for: Survey of cryptic unstable transcripts in yeast
Source: PubMed Central journal article supplement (PMC4845318; doi:10.1186/s12864-016-2622-5), 2016-04-26

**A.** S288c 5' Nucleosome Metagene Plot

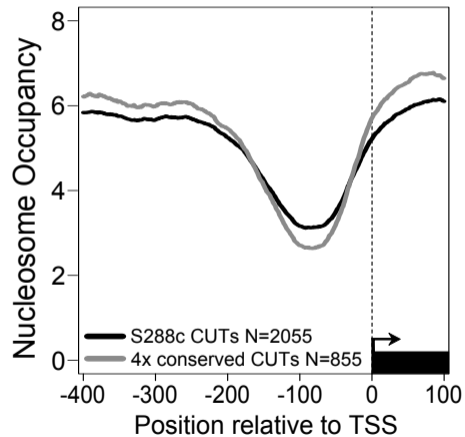

**B.**  $\Sigma$ 1278b 5' Nucleosome Metagene Plot

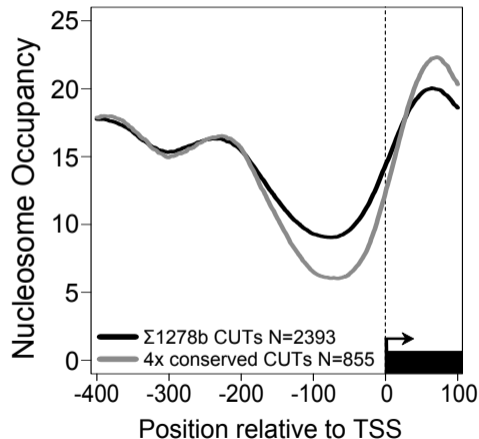

**C.** *S.paradoxus*<sub>(N17)</sub>  
5' Nucleosome Metagene Plot

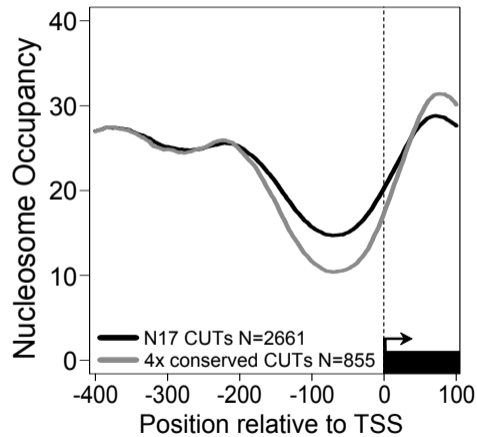

Supplement: 12864_2016_2622_MOESM8_ESM.pdf [file 12864_2016_2622_MOESM8_ESM.pdf]
