# Supplementary material for: Survey of cryptic unstable transcripts in yeast
Source: PubMed Central journal article supplement (PMC4845318; doi:10.1186/s12864-016-2622-5), 2016-04-26

### A. Random CUT conservation

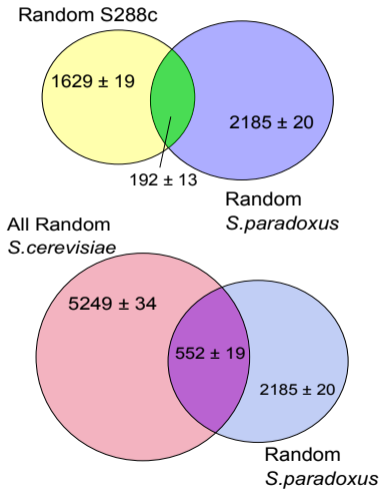

### B. Actual vs. Random 4x CUT conservation

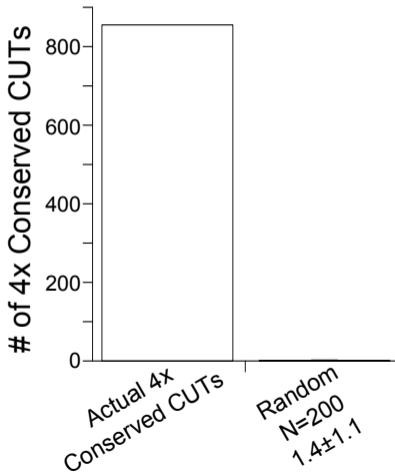

Supplement: 12864_2016_2622_MOESM15_ESM.pdf [file 12864_2016_2622_MOESM15_ESM.pdf]
